# Supplementary material for: Molecular Epidemiology and Evolution of Coxsackievirus A9
Source: MDPI journal article supplement (doi:10.3390/v14040822), 2022-04-15
Supplement: s1 [file s1]

**Table S1.** The primers designed in this study for amplifying and sequencing the whole genome sequence of CVA9

| Name       | Location  |                            |             | Direction | Source     |
|------------|-----------|----------------------------|-------------|-----------|------------|
| 0001S48    | -         | GGGGACAAGTTTGTACAAAAAAGCAG | 0–700bp     | Forward   | -          |
| CVA9-541A  | 523–541   | CTGCAGAGTTGCCCCGTAC        |             | Reverse   | This study |
| CVA9-520S  | 520–538   | GTCGTAACGGGCAACTCTG        | 600–1500bp  | Forward   | This study |
| CVA9-1205A | 1186–1205 | CTGGGAAGTTCCACCACCAC       |             | Reverse   | This study |
| CVA9-1185S | 1185–1206 | GGTGGTGAAGTTCCCAGA         | 1300–2200bp | Forward   | This study |
| CVA9-1562A | 1543–1562 | GCATCACTATGGTGGCACTG       |             | Reverse   | This study |
| CVA9-1543S | 1543–1562 | CAGTGCCACCATAGTGATGC       | 2000–2800bp | Forward   | This study |
| CVA9-2343A | 2323–2343 | GGTGGGACAATCATACCAGTC      |             | Reverse   | This study |
| CVA9-2407S | 2407–2426 | GATGTTAAGAGACACTCCAT       | 2700–3600bp | Forward   | This study |
| CVA9-2839A | 2820–2839 | ATCACAAGTCGGCAAGATCC       |             | Reverse   | This study |
| CVA9-3256S | 3256–3275 | CAACACCCATCACAGACACC       | 3350–4200bp | Forward   | This study |
| CVA9-3652A | 3629–3652 | GAACCTCCCCATGGTTACCT       |             | Reverse   | This study |
| CVA9-3829S | 3829–3848 | ACAACCTGGGAACGCTTTTG       | 4000–4900bp | Forward   | This study |
| CVA9-4841A | 4822–4841 | GCAAGGAGGTTTCACTTCGA       |             | Reverse   | This study |
| CVA9-3963S | 3963–3992 | GCATTGGTGATTGTGGTGAG       | 4800–5700bp | Forward   | This study |
| CVA9-5821A | 5802–5821 | ATAAACCTGGGTGGTACCCC       |             | Reverse   | This study |
| CVA9-5624S | 5624–5643 | GATGGCACCAATTTGGAGTT       | 5600–6300bp | Forward   | This study |
| CVA9-6138A | 6119–6138 | TACTCCCCTCAAAGACGTGG       |             | Reverse   | This study |
| CVA9-5943S | 5943–5962 | GCAGCCCTCCTCAAACACTA       | 5900–6800bp | Forward   | This study |
| CVA9-6837A | 6818–6837 | TACTCCCCTCAAAGACGTGG       |             | Reverse   | This study |
| CVA9-7054S | 7054–7073 | AGACAAAGGGGAGTGCTTCA       | 6500–7500bp | Forward   | This study |
| 7500A      | -         | GGGGACCACTTTGTACAAGAAAGCTG |             | Reverse   | -          |
