# Supplementary material for: Molecular Epidemiology and Evolution of Coxsackievirus A9
Source: MDPI journal article supplement (doi:10.3390/v14040822), 2022-04-15
Supplement: s1 [file s1]

**Table S4.** The results of the Bayes test did by SPREAD

| FROM    | TO        | BAYES_FACTOR(BF)   | POSTERIOR PROBABILITY |
|---------|-----------|--------------------|-----------------------|
| USA     | Thailand  | 2977.8214009700323 | 0.9958893456282635    |
| USA     | UK        | 2621.8556008631185 | 0.995333851794245     |
| France  | Romania   | 1320.650495412015  | 0.9907788023552938    |
| USA     | Tunisia   | 1116.628788982404  | 0.9891123208532385    |
| USA     | China     | 1083.0965085197197 | 0.9887790245528275    |
| Tunisia | Japan     | 654.179587741939   | 0.9815576047105877    |
| USA     | France    | 549.303455062889   | 0.9781135429396733    |
| India   | USA       | 468.72681343374126 | 0.9744472836351517    |
| USA     | Poland    | 118.79182067995194 | 0.906232640817687     |
| Japan   | USA       | 18.31287666196111  | 0.5983779580046662    |
| Japan   | Canada    | 17.537251296776425 | 0.5879346739251194    |
| Poland  | Russia    | 12.321398797824637 | 0.5006110432174203    |
| Japan   | India     | 11.650288094627882 | 0.48661259860015554   |
| Canada  | India     | 7.667938717576347  | 0.3841795356071548    |
| France  | India     | 6.221760840468351  | 0.33607376958115764   |
| USA     | Russia    | 5.458426690374711  | 0.3075213865126097    |
| France  | Tunisia   | 5.294782547333201  | 0.3010776580379958    |
| India   | Canada    | 4.527495923669128  | 0.26919231196533716   |
| India   | Cuba      | 4.1329928202566215 | 0.2516387068103544    |
| Japan   | Cuba      | 4.079525096009087  | 0.24919453394067326   |
| India   | Australia | 4.077103015076382  | 0.24908343517386958   |
| France  | Australia | 4.0480938472549886 | 0.2477502499722253    |
| India   | France    | 3.719413888531312  | 0.23230752138651262   |
| China   | Poland    | 3.5158197594151237 | 0.22241973114098434   |
| Cuba    | Australia | 3.4103790036224284 | 0.21719808910121097   |
| Japan   | France    | 3.308534932716999  | 0.2120875458282413    |
| France  | Cuba      | 3.2123474868260335 | 0.20719920008887902   |
