# Supplementary material for: Molecular Epidemiology and Evolution of Coxsackievirus A9
Source: MDPI journal article supplement (doi:10.3390/v14040822), 2022-04-15
Supplement: s1 [file s1]

**Table S2.** 128 isolates used for phylogenetic analysis of CVA9

| No. | genotype | Sample ID                  | Isolation Year | Country of Origin | Sample Type | Clinical Symptoms    | GenBank Accession | Source  |
|-----|----------|----------------------------|----------------|-------------------|-------------|----------------------|-------------------|---------|
| 1   | A        | Griggs                     | 1950           | USA               | Clone       | N/A                  | D00627            | GenBank |
| 2   | B        | CO62                       | 1962           | UK                | Unknown     | N/A                  | JN996502          | GenBank |
| 3   | C        | CO79                       | 1979           | UK                | Unknown     | N/A                  | JN996501          | GenBank |
| 4   | D        | Cuba47of93                 | 1993           | Cuba              | CSF         | Neuropathy           | AY466031          | GenBank |
| 5   | D        | Cuba23of00                 | 2000           | Cuba              | CSF         | Meningitis           | AY466033          | GenBank |
| 6   | D        | Cuba689of93                | 1993           | Cuba              | CSF         | Neuropathy           | AY466032          | GenBank |
| 7   | D        | Cuba35of93                 | 1993           | Cuba              | CSF         | Neuropathy           | AY466030          | GenBank |
| 8   | D        | Cuba270of90                | 1990           | Cuba              | CSF         | Meningitis           | AY466024          | GenBank |
| 9   | D        | Cuba267of90                | 1990           | Cuba              | CSF         | Meningitis           | AY466029          | GenBank |
| 10  | D        | Cuba163of91                | 1991           | Cuba              | CSF         | Meningitis           | AY466028          | GenBank |
| 11  | D        | Cuba135of91                | 1991           | Cuba              | CSF         | Meningitis           | AY466027          | GenBank |
| 12  | D        | Cuba96of91                 | 1991           | Cuba              | CSF         | Meningitis           | AY466022          | GenBank |
| 13  | D        | Cuba45of91                 | 1991           | Cuba              | CSF         | Meningitis           | AY466025          | GenBank |
| 14  | D        | Cuba450of90                | 1990           | Cuba              | CSF         | Meningitis           | AY466023          | GenBank |
| 15  | D        | Cuba100of91                | 1991           | Cuba              | CSF         | Meningitis           | AY466026          | GenBank |
| 16  | D        | 2-MRS2013                  | 2013           | France            | CSF         | AM                   | KM201659          | GenBank |
| 17  | D        | RO-609-4-80                | 1980           | Romania           | stool       | N/A                  | LS451285          | GenBank |
| 18  | E        | CO85                       | 1985           | UK                | CSF         | N/A                  | JN996500          | GenBank |
| 19  | F        | CO87                       | 1987           | UK                | Unknown     | N/A                  | JN996499          | GenBank |
| 20  | F        | A16-52PD                   | 2010           | India             | Stool       | Persistent diarrhea  | KF177114          | GenBank |
| 21  | F        | NIV56210                   | 2005           | India             | Stool       | AFP                  | KF412927          | GenBank |
| 22  | F        | A450D                      | 2011           | India             | Unknown     | Acute diarrhea       | JX513563          | GenBank |
| 23  | F        | 263/CSF/CVA9/RUS/Omsk/2012 | 2012           | Russia            | CSF         | AM                   | KU133575          | GenBank |
| 24  | F        | 382/CSF/CVA9/RUS/Omsk/2013 | 2013           | Russia            | CSF         | AM                   | KU133620          | GenBank |
| 25  | G        | 06.109.3344                | 2006           | Australia         | Unknown     | AM                   | FJ868282          | GenBank |
| 26  | G        | NSW-V20-2008-CVA9          | 2008           | Australia         | Stool       | N/A                  | MF678309          | GenBank |
| 27  | G        | NSW-V56-2006-CVA9          | 2006           | Australia         | Stool       | N/A                  | MF678346          | GenBank |
| 28  | G        | CVA9/EBMSV0003/THA/2010    | 2010           | Thailand          | Throat      | Respiratory diseases | KU574638          | GenBank |
| 29  | G        | Patient FJ98-90            | 2004           | FJ/China          | Unknown     | Unknown              | AY573577          | GenBank |
| 30  | G        | Patient FJ00-127           | 2004           | FJ/China          | Unknown     | Unknown              | AY573578          | GenBank |
| 31  | G        | 97089/SD/CHN/1997/C A9     | 1997           | SD/China          | Unknown     | N/A                  | GQ329727          | GenBank |
| 32  | G        | 01332/SD/CHN/2001/C A9     | 2001           | SD/China          | Unknown     | N/A                  | GQ329730          | GenBank |
| 33  | G        | CVA9_CF027040_FRA07        | 2007           | France            | Throat      | N/A                  | HF948081          | GenBank |
| 34  | G        | 064/LY/CHN/AM/10/CA 9      | 2010           | SD/China          | CSF         | AM                   | KF150145          | GenBank |
| 35  | G        | CVA9/FJZZ122/CHN/2011      | 2011           | FJ/China          | Stool       | HFMD                 | MG922505          | GenBank |
| 36  | G        | YZ047/SD/CHN/2005/C A9     | 2005           | SD/China          | Stool       | HFMD                 | GQ246517          | GenBank |
| 37  | G        | CVA9_Alberta_2013          | 2013           | Canada            | CSF         | AM                   | JQ837913          | GenBank |
| 38  | G        | 97186/SD/CHN/1997/C A9     | 1997           | SD/China          | Stool       | HFMD                 | GQ329728          | GenBank |
| 39  | G        | 00365/SD/CHN/2000/C A9     | 2000           | SD/China          | Stool       | HFMD                 | GQ329729          | GenBank |
| 40  | G        | 04318/SD/CHN/2004/C A9     | 2004           | SD/China          | Stool       | HFMD                 | GQ329731          | GenBank |
| 41  | G        | USA/MI/2005-23029          | 2005           | USA               | Unknown     | N/A                  | MH752987          | GenBank |
| 42  | G        | NSW-V14-2009-CVA9          | 2009           | Australia         | Stool       | N/A                  | MF678303          | GenBank |

|    |   |                            |           |           |         |                         |          |         |
|----|---|----------------------------|-----------|-----------|---------|-------------------------|----------|---------|
| 43 | G | 1-D7-CA9                   | 2008      | TW/China  | Throat  | Rash                    | KT353721 | GenBank |
| 44 | G | 61238-7074                 | 2008      | TW/China  | Throat  | Rash                    | MF422557 | GenBank |
| 45 | G | JB14080245                 | 2008      | GD/China  | Stool   | HFMD                    | KC867074 | GenBank |
| 46 | G | Gansu05-<br>1/GS/CHN/2005  | 2005      | GS/China  | CSF     | AM                      | GQ294574 | GenBank |
| 47 | G | A242/YN/CHN/2009           | 2009      | YN/China  | Feces   | AM                      | KM890278 | GenBank |
| 48 | G | 2249/PL12/3013             | 2013      | Poland    | Stool   | AFP                     | KU189253 | GenBank |
| 49 | G | CVA9/PMKA0512/THA/<br>2010 | 2010      | Thailand  | Throat  | Respiratory<br>diseases | KU574637 | GenBank |
| 50 | G | CVA9/PMKA0420/THA/<br>2010 | 2010      | Thailand  | Throat  | Respiratory<br>diseases | KU574636 | GenBank |
| 51 | G | CVA9_Alberta_2010          | 2010      | Canada    | CSF     | AM                      | JQ837914 | GenBank |
| 52 | G | 253/JN/CHN/AM/10/CA<br>9   | 2010      | SD/China  | CSF     | AM                      | KF246748 | GenBank |
| 53 | G | A14/YN/CHN/2010            | 2010      | YN/China  | CSF     | AM                      | MF098518 | GenBank |
| 54 | G | A73/YN/CHN/2010            | 2010      | YN/China  | CSF     | AM                      | MF098523 | GenBank |
| 55 | G | NSW-V41-2013-CVA9          | 2013      | Australia | Stool   | N/A                     | MF678330 | GenBank |
| 56 | G | P73/ZS/CHN/2011            | 2011      | China/GX  | Stool   | HFMD                    | MN018193 | GenBank |
| 57 | G | 024/LS/CHN/AM/08/CA<br>9   | 2008      | SD/China  | CSF     | AM                      | KF246747 | GenBank |
| 58 | G | USA/2019-23312             | 2019      | USA       | Liver   | Unknown                 | MN896915 | GenBank |
| 59 | G | USA/2019-23313             | 2019      | USA       | Liver   | Unknown                 | MN896916 | GenBank |
| 60 | G | USA/2019-23314             | 2019      | USA       | Liver   | Unknown                 | MN896917 | GenBank |
| 61 | G | CLI-B1-10-CV-A9            | 2017      | UK        | CSF     | AM                      | MT641360 | GenBank |
| 62 | G | 16C2                       | 2016      | USA       | Unknown | N/A                     | KY674974 | GenBank |
| 63 | G | 16C8                       | 2016      | USA       | Unknown | N/A                     | KY674976 | GenBank |
| 64 | G | CVA9/FJQZ126/CHN/20<br>11  | 2011      | FJ/China  | Stool   | HFMD                    | MG922506 | GenBank |
| 65 | G | A108/YN/CHN/2009           | 2009      | YN/China  | Feces   | AM                      | KM890277 | GenBank |
| 66 | G | A744/YN/CHN/2009           | 2009      | YN/China  | CSF     | AM                      | MN686207 | GenBank |
| 67 | G | CVA9/FJZZ056/CHN/20<br>11  | 2011      | FJ/China  | Stool   | HFMD                    | MG922504 | GenBank |
| 68 | G | CV-A9/P351/2013/China      | 2013      | ZJ/China  | CSF     | AM                      | KP289437 | GenBank |
| 69 | G | LHY03                      | 2010      | JS/China  | Unknown | HFMD                    | KP266574 | GenBank |
| 70 | G | JB141230009                | 2012      | GD/China  | Stool   | HFMD                    | KC867075 | GenBank |
| 71 | G | 071/LY/CHN/AM/10/CV<br>A9  | 2010      | SD/China  | CSF     | AM                      | KF150146 | GenBank |
| 72 | G | C1/LC/2019                 | 2019      | SD/China  | CSF     | AM                      | MT950542 | GenBank |
| 73 | G | C23/LC/CHN/2019            | 2019      | SD/China  | CSF     | AM                      | MT950564 | GenBank |
| 74 | G | C39/LC/CHN/2018            | 2018      | SD/China  | CSF     | AM                      | MT646125 | GenBank |
| 75 | G | ZG2018-176-CVA9            | 2018      | SC/China  | Stool   | HFMD                    | MW179455 | GenBank |
| 76 | G | JB141230166                | 2012      | GD/China  | Stool   | HFMD                    | KC867076 | GenBank |
| 77 | G | JB141230172                | 2012      | GD/China  | Stool   | HFMD                    | KC867077 | GenBank |
| 78 | G | JB141230177                | 2012      | GD/China  | Stool   | HFMD                    | KC867078 | GenBank |
| 79 | G | CVA9/P56/2013/China        | 2013      | ZJ/China  | Stool   | HFMD                    | KP289434 | GenBank |
| 80 | G | CVA9/FJZ463/CHN/202<br>0   | 2014      | FJ/China  | Stool   | HFMD                    | MG922507 | GenBank |
| 81 | G | DY2016-50-CVA9             | 2014/2019 | SC/China  | Stool   | N/A                     | MW179442 | GenBank |
| 82 | G | CV-A9/P220/2013/China      | 2013      | ZJ/China  | Stool   | HFMD                    | KP290111 | GenBank |
| 83 | G | A34-YN-CHN-2014            | 2014      | YN/China  | Stool   | HFMD                    | LC013414 | GenBank |
| 84 | G | A34-YN-CHN-2014            | 2014      | YN/China  | Stool   | HFMD                    | LC411969 | GenBank |
| 85 | G | 120-YN-CHN-2014JK          | 2014      | YN/China  | Homo    | Healthy<br>children     | LC120871 | GenBank |
| 86 | G | CVA9/FJQZ182/CHN/20<br>12  | 2012      | FJ/China  | Stool   | HFMD                    | MG922503 | GenBank |
| 87 | G | C28/LC/CHN/2019            | 2019      | SD/China  | CSF     | AM                      | MT950569 | GenBank |
| 88 | G | C38/LC/CHN/2019            | 2019      | SD/China  | CSF     | AM                      | MT950579 | GenBank |

|     |   |                               |           |           |         |                  |          |            |
|-----|---|-------------------------------|-----------|-----------|---------|------------------|----------|------------|
| 89  | G | C18-YN-CHN-2018               | 2018      | YN/China  | Stool   | HFMD             | LC481444 | GenBank    |
| 90  | G | C20-YN-CHN-2018               | 2018      | YN/China  | Stool   | HFMD             | LC481445 | GenBank    |
| 91  | G | DY2016-18-CVA9                | 2016      | SC/China  | Homo    | Healthy children | MW179429 | GenBank    |
| 92  | G | DY2016-21-CVA9                | 2014/2019 | SC/China  | Unknown | Healthy child    | MW179431 | GenBank    |
| 93  | G | A280-KM-CHN-CVA9              | 2018      | YN/China  | Unknown | HFMD             | LC516768 | GenBank    |
| 94  | G | C4/LC/CHN/2019                | 2019      | SD/China  | CSF     | AM               | MT950545 | GenBank    |
| 95  | G | C16/LC/CHN/2019               | 2019      | SD/China  | CSF     | AM               | MT950557 | GenBank    |
| 96  | G | SF149                         | 2016      | SC/China  | Stool   | Healthy children | LC361281 | GenBank    |
| 97  | G | ZJ154                         | 2016      | ZJ/China  | Stool   | N/A              | LC361282 | GenBank    |
| 98  | G | ZJ160                         | 2016      | ZJ/China  | Stool   | N/A              | LC361283 | GenBank    |
| 99  | G | China/GS/2015/05              | 2015      | GS/China  | Stool   | HFMD             | OM885385 | This study |
| 100 | G | China/GS/2015/61              | 2015      | GS/China  | Stool   | HFMD             | OM885386 | This study |
| 101 | G | China/GS/2015/254             | 2015      | GS/China  | Stool   | HFMD             | OM885387 | This study |
| 102 | G | China/GX/2019/175             | 2019      | GX/China  | Stool   | HFMD             | OM885388 | This study |
| 103 | G | China/HeB/2019/98             | 2019      | HeB/China | Stool   | HFMD             | OM885389 | This study |
| 104 | G | China/SaX/2019/49             | 2019      | SaX/China | Stool   | HFMD             | OM885390 | This study |
| 105 | G | China/SD/2015/41              | 2015      | SD/China  | Stool   | HFMD             | OM885392 | This study |
| 106 | G | China/SD/2016/246             | 2016      | SD/China  | Stool   | HFMD             | OM885391 | This study |
| 107 | G | China/SD/2019/074             | 2019      | SD/China  | Stool   | HFMD             | OM885393 | This study |
| 108 | G | China/SD/2019/114             | 2019      | SD/China  | Stool   | HFMD             | OM885394 | This study |
| 109 | G | China/SD/2019/130             | 2019      | SD/China  | Stool   | HFMD             | OM885395 | This study |
| 110 | G | China/SD/2019/323             | 2019      | SD/China  | Stool   | HFMD             | OM885396 | This study |
| 111 | G | China/SD/2019/403             | 2019      | SD/China  | Stool   | HFMD             | OM885397 | This study |
| 112 | G | China/SD/2019/437             | 2019      | SD/China  | Stool   | HFMD             | OM885398 | This study |
| 113 | G | China/XJ/2015/83              | 2015      | XJ/China  | Stool   | HFMD             | OM885399 | This study |
| 114 | G | China/XJ/2017/117             | 2015      | XJ/China  | Stool   | HFMD             | OM885400 | This study |
| 115 | G | China/XJ/2018/101             | 2015      | XJ/China  | Stool   | HFMD             | OM885402 | This study |
| 116 | G | China/YN/2014/131             | 2014      | YN/China  | Stool   | HFMD             | OM885403 | This study |
| 117 | H | 99.358.0740                   | 1999      | Australia | Unknown | N/A              | GU142874 | GenBank    |
| 118 | I | CF315290013_FRA15-10-16_CV-A9 | 2015      | France    | CSF     | meningitis       | MK086198 | GenBank    |
| 119 | I | 408/CSF/CVA9/RUS/Omsk/2013    | 2013      | Russia    | CSF     | AM               | KU133635 | GenBank    |
| 120 | I | SPb_5005/13EVI/RKa-32/14/RU   | 2013      | Russia    | CSF     | AM               | KU841453 | GenBank    |
| 121 | I | 297/CSF/CVA9/RUS/Omsk/2012    | 2012      | Russia    | CSF     | AM               | KU133591 | GenBank    |
| 122 | I | 302/CSF/CVA9/RUS/Omsk/2012    | 2012      | Russia    | CSF     | AM               | KU133594 | GenBank    |
| 123 | I | 299/CSF/CVA9/RUS/Omsk/2012    | 2012      | Russia    | CSF     | AM               | KU133593 | GenBank    |
| 124 | I | 309/CSF/CVA9/RUS/Omsk/2012    | 2012      | Russia    | CSF     | AM               | KU133597 | GenBank    |
| 125 | I | 270/CSF/CVA9/RUS/Omsk/2012    | 2012      | Russia    | CSF     | AM               | KU133580 | GenBank    |
| 126 | I | 325/CSF/CVA9/RUS/Omsk/2012    | 2012      | Russia    | CSF     | AM               | KU133606 | GenBank    |
| 127 | I | China/XJ/2018/99              | 2018      | XJ/China  | Stool   | HFMD             | OM885401 | This study |
| 128 | J | USA/2015/CA-RGDS-1050         | 2015      | USA       | stool   | unknown          | MN166093 | GenBank    |
