# Supplementary material for: Molecular Epidemiology and Evolution of Coxsackievirus A9
Source: MDPI journal article supplement (doi:10.3390/v14040822), 2022-04-15
Supplement: s1 [file s1]

**Table S3.** 165 isolates used for phylogeographic analysis of CVA9

| No. | Sample ID                  | Isolation Year | Country of Origin | Sample Type | Clinical Symptoms     | GenBank Accession | Source  |
|-----|----------------------------|----------------|-------------------|-------------|-----------------------|-------------------|---------|
| 1   | NIV099401                  | 2009           | India             | Stool       | Acute gastroenteritis | KF413000          | GenBank |
| 2   | CO62                       | 1962           | UK                | Unknown     | N/A                   | JN996502          | GenBank |
| 3   | CO79                       | 1979           | UK                | Unknown     | N/A                   | JN996501          | GenBank |
| 4   | Cuba47of93                 | 1993           | Cuba              | CSF         | Neuropathy            | AY466031          | GenBank |
| 5   | Cuba23of00                 | 2000           | Cuba              | CSF         | Meningitis            | AY466033          | GenBank |
| 6   | Cuba689of93                | 1993           | Cuba              | CSF         | Neuropathy            | AY466032          | GenBank |
| 7   | Cuba35of93                 | 1993           | Cuba              | CSF         | Neuropathy            | AY466030          | GenBank |
| 8   | Cuba270of90                | 1990           | Cuba              | CSF         | Meningitis            | AY466024          | GenBank |
| 9   | Cuba267of90                | 1990           | Cuba              | CSF         | Meningitis            | AY466029          | GenBank |
| 10  | Cuba163of91                | 1991           | Cuba              | CSF         | Meningitis            | AY466028          | GenBank |
| 11  | Cuba135of91                | 1991           | Cuba              | CSF         | Meningitis            | AY466027          | GenBank |
| 12  | Cuba96of91                 | 1991           | Cuba              | CSF         | Meningitis            | AY466022          | GenBank |
| 13  | Cuba45of91                 | 1991           | Cuba              | CSF         | Meningitis            | AY466025          | GenBank |
| 14  | Cuba450of90                | 1990           | Cuba              | CSF         | Meningitis            | AY466023          | GenBank |
| 15  | Cuba100of91                | 1991           | Cuba              | CSF         | Meningitis            | AY466026          | GenBank |
| 16  | 2-MRS2013                  | 2013           | France            | CSF         | AM                    | KM201659          | GenBank |
| 17  | RO-609-4-80                | 1980           | Romania           | stool       | N/A                   | LS451285          | GenBank |
| 18  | CO85                       | 1985           | UK                | CSF         | N/A                   | JN996500          | GenBank |
| 19  | CO87                       | 1987           | UK                | Unknown     | N/A                   | JN996499          | GenBank |
| 20  | A16-52PD                   | 2010           | India             | Stool       | Persistent diarrhea   | KF177114          | GenBank |
| 21  | NIV56210                   | 2005           | India             | Stool       | AFP                   | KF412927          | GenBank |
| 22  | A450D                      | 2011           | India             | Unknown     | Acute diarrhea        | JX513563          | GenBank |
| 23  | 263/CSF/CVA9/RUS/Omsk/2012 | 2012           | Russia            | CSF         | AM                    | KU133575          | GenBank |
| 24  | 382/CSF/CVA9/RUS/Omsk/2013 | 2013           | Russia            | CSF         | AM                    | KU133620          | GenBank |
| 25  | 06.109.3344                | 2006           | Australia         | Unknown     | AM                    | FJ868282          | GenBank |
| 26  | NSW-V20-2008-CVA9          | 2008           | Australia         | Stool       | N/A                   | MF678309          | GenBank |
| 27  | NSW-V56-2006-CVA9          | 2006           | Australia         | Stool       | N/A                   | MF678346          | GenBank |
| 28  | CVA9/EBMSV0003/THA/2010    | 2010           | Thailand          | Throat      | Respiratory diseases  | KU574638          | GenBank |
| 29  | Patient FJ98-90            | 2004           | FJ/China          | Unknown     | Unknown               | AY573577          | GenBank |
| 30  | Patient FJ00-127           | 2004           | FJ/China          | Unknown     | Unknown               | AY573578          | GenBank |
| 31  | 97089/SD/CHN/1997/CA9      | 1997           | SD/China          | Unknown     | N/A                   | GQ329727          | GenBank |
| 32  | 01332/SD/CHN/2001/CA9      | 2001           | SD/China          | Unknown     | N/A                   | GQ329730          | GenBank |
| 33  | CVA9_CF027040_FRA07        | 2007           | France            | Throat      | N/A                   | HF948081          | GenBank |
| 34  | 064/LY/CHN/AM/10/CA9       | 2010           | SD/China          | CSF         | AM                    | KF150145          | GenBank |
| 35  | CVA9/FJZZ122/CHN/2011      | 2011           | FJ/China          | Stool       | HFMD                  | MG922505          | GenBank |
| 36  | YZ047/SD/CHN/2005/CA9      | 2005           | SD/China          | Stool       | HFMD                  | GQ246517          | GenBank |
| 37  | CVA9_Alberta_2013          | 2013           | Canada            | CSF         | AM                    | JQ837913          | GenBank |
| 38  | 97186/SD/CHN/1997/CA9      | 1997           | SD/China          | Stool       | HFMD                  | GQ329728          | GenBank |
| 39  | 00365/SD/CHN/2000/CA9      | 2000           | SD/China          | Stool       | HFMD                  | GQ329729          | GenBank |
| 40  | 04318/SD/CHN/2004/CA9      | 2004           | SD/China          | Stool       | HFMD                  | GQ329731          | GenBank |
| 41  | USA/MI/2005-23029          | 2005           | USA               | Unknown     | N/A                   | MH752987          | GenBank |
| 42  | NSW-V14-2009-CVA9          | 2009           | Australia         | Stool       | N/A                   | MF678303          | GenBank |
| 43  | 1-D7-CA9                   | 2008           | TW/China          | Throat      | Rash                  | KT353721          | GenBank |
| 44  | 61238-7074                 | 2008           | TW/China          | Throat      | Rash                  | MF422557          | GenBank |
| 45  | JB14080245                 | 2008           | GD/China          | Stool       | HFMD                  | KC867074          | GenBank |
| 46  | Gansu05-1/GS/CHN/2005      | 2005           | GS/China          | CSF         | AM                    | GQ294574          | GenBank |
| 47  | A242/YN/CHN/2009           | 2009           | YN/China          | Feces       | AM                    | KM890278          | GenBank |
| 48  | 2249/PL12/3013             | 2013           | Poland            | Stool       | AFP                   | KU189253          | GenBank |
| 49  | CVA9/PMKA0512/THA/2010     | 2010           | Thailand          | Throat      | Respiratory diseases  | KU574637          | GenBank |

|     |                        |           |           |         |                      |          |            |
|-----|------------------------|-----------|-----------|---------|----------------------|----------|------------|
| 50  | CVA9/PMKA0420/THA/2010 | 2010      | Thailand  | Throat  | Respiratory diseases | KU574636 | GenBank    |
| 51  | CVA9_Alberta_2010      | 2010      | Canada    | CSF     | AM                   | JQ837914 | GenBank    |
| 52  | 253/JN/CHN/AM/10/CA9   | 2010      | SD/China  | CSF     | AM                   | KF246748 | GenBank    |
| 53  | A14/YN/CHN/2010        | 2010      | YN/China  | CSF     | AM                   | MF098518 | GenBank    |
| 54  | A73/YN/CHN/2010        | 2010      | YN/China  | CSF     | AM                   | MF098523 | GenBank    |
| 55  | NSW-V41-2013-CVA9      | 2013      | Australia | Stool   | N/A                  | MF678330 | GenBank    |
| 56  | P73/ZS/CHN/2011        | 2011      | China/GX  | Stool   | HFMD                 | MN018193 | GenBank    |
| 57  | 024/LS/CHN/AM/08/CA9   | 2008      | SD/China  | CSF     | AM                   | KF246747 | GenBank    |
| 58  | USA/2019-23312         | 2019      | USA       | Liver   | Unknown              | MN896915 | GenBank    |
| 59  | USA/2019-23313         | 2019      | USA       | Liver   | Unknown              | MN896916 | GenBank    |
| 60  | USA/2019-23314         | 2019      | USA       | Liver   | Unknown              | MN896917 | GenBank    |
| 61  | CLI-B1-10-CV-A9        | 2017      | UK        | CSF     | AM                   | MT641360 | GenBank    |
| 62  | 16C2                   | 2016      | USA       | Unknown | N/A                  | KY674974 | GenBank    |
| 63  | 16C8                   | 2016      | USA       | Unknown | N/A                  | KY674976 | GenBank    |
| 64  | CVA9/FJQZ126/CHN/2011  | 2011      | FJ/China  | Stool   | HFMD                 | MG922506 | GenBank    |
| 65  | A108/YN/CHN/2009       | 2009      | YN/China  | Feces   | AM                   | KM890277 | GenBank    |
| 66  | A744/YN/CHN/2009       | 2009      | YN/China  | CSF     | AM                   | MN686207 | GenBank    |
| 67  | CVA9/FJZZ056/CHN/2011  | 2011      | FJ/China  | Stool   | HFMD                 | MG922504 | GenBank    |
| 68  | CV-A9/P351/2013/China  | 2013      | ZJ/China  | CSF     | AM                   | KP289437 | GenBank    |
| 69  | LHY03                  | 2010      | JS/China  | Unknown | HFMD                 | KP266574 | GenBank    |
| 70  | JB141230009            | 2012      | GD/China  | Stool   | HFMD                 | KC867075 | GenBank    |
| 71  | 071/LY/CHN/AM/10/CVA9  | 2010      | SD/China  | CSF     | AM                   | KF150146 | GenBank    |
| 72  | C1/LC/2019             | 2019      | SD/China  | CSF     | AM                   | MT950542 | GenBank    |
| 73  | C23/LC/CHN/2019        | 2019      | SD/China  | CSF     | AM                   | MT950564 | GenBank    |
| 74  | C39/LC/CHN/2018        | 2018      | SD/China  | CSF     | AM                   | MT646125 | GenBank    |
| 75  | ZG2018-176-CVA9        | 2018      | SC/China  | Stool   | HFMD                 | MW179455 | GenBank    |
| 76  | JB141230166            | 2012      | GD/China  | Stool   | HFMD                 | KC867076 | GenBank    |
| 77  | JB141230172            | 2012      | GD/China  | Stool   | HFMD                 | KC867077 | GenBank    |
| 78  | JB141230177            | 2012      | GD/China  | Stool   | HFMD                 | KC867078 | GenBank    |
| 79  | CVA9/P56/2013/China    | 2013      | ZJ/China  | Stool   | HFMD                 | KP289434 | GenBank    |
| 80  | CVA9/FJZ463/CHN/2020   | 2014      | FJ/China  | Stool   | HFMD                 | MG922507 | GenBank    |
| 81  | DY2016-50-CVA9         | 2014/2019 | SC/China  | Stool   | N/A                  | MW179442 | GenBank    |
| 82  | CV-A9/P220/2013/China  | 2013      | ZJ/China  | Stool   | HFMD                 | KP290111 | GenBank    |
| 83  | A34-YN-CHN-2014        | 2014      | YN/China  | Stool   | HFMD                 | LC013414 | GenBank    |
| 84  | A34-YN-CHN-2014        | 2014      | YN/China  | Stool   | HFMD                 | LC411969 | GenBank    |
| 85  | 120-YN-CHN-2014JK      | 2014      | YN/China  | Homo    | Healthy children     | LC120871 | GenBank    |
| 86  | CVA9/FJQZ182/CHN/2012  | 2012      | FJ/China  | Stool   | HFMD                 | MG922503 | GenBank    |
| 87  | C28/LC/CHN/2019        | 2019      | SD/China  | CSF     | AM                   | MT950569 | GenBank    |
| 88  | C38/LC/CHN/2019        | 2019      | SD/China  | CSF     | AM                   | MT950579 | GenBank    |
| 89  | C18-YN-CHN-2018        | 2018      | YN/China  | Stool   | HFMD                 | LC481444 | GenBank    |
| 90  | C20-YN-CHN-2018        | 2018      | YN/China  | Stool   | HFMD                 | LC481445 | GenBank    |
| 91  | DY2016-18-CVA9         | 2016      | SC/China  | Homo    | Healthy children     | MW179429 | GenBank    |
| 92  | DY2016-21-CVA9         | 2014/2019 | SC/China  | Unknown | Healthy child        | MW179431 | GenBank    |
| 93  | A280-KM-CHN-CVA9       | 2018      | YN/China  | Unknown | HFMD                 | LC516768 | GenBank    |
| 94  | C4/LC/CHN/2019         | 2019      | SD/China  | CSF     | AM                   | MT950545 | GenBank    |
| 95  | C16/LC/CHN/2019        | 2019      | SD/China  | CSF     | AM                   | MT950557 | GenBank    |
| 96  | SF149                  | 2016      | SC/China  | Stool   | Healthy children     | LC361281 | GenBank    |
| 97  | ZJ154                  | 2016      | ZJ/China  | Stool   | N/A                  | LC361282 | GenBank    |
| 98  | ZJ160                  | 2016      | ZJ/China  | Stool   | N/A                  | LC361283 | GenBank    |
| 99  | China/GS/2015/05       | 2015      | GS/China  | Stool   | HFMD                 | OM885385 | This study |
| 100 | China/GS/2015/61       | 2015      | GS/China  | Stool   | HFMD                 | OM885386 | This study |
| 101 | China/GS/2015/254      | 2015      | GS/China  | Stool   | HFMD                 | OM885387 | This study |
| 102 | China/GX/2019/175      | 2019      | GX/China  | Stool   | HFMD                 | OM885388 | This study |

|     |                                |      |           |         |            |          |            |
|-----|--------------------------------|------|-----------|---------|------------|----------|------------|
| 103 | China/HeB/2019/98              | 2019 | HeB/China | Stool   | HFMD       | OM885389 | This study |
| 104 | China/SaX/2019/49              | 2019 | SaX/China | Stool   | HFMD       | OM885390 | This study |
| 105 | China/SD/2015/41               | 2015 | SD/China  | Stool   | HFMD       | OM885392 | This study |
| 106 | China/SD/2016/246              | 2016 | SD/China  | Stool   | HFMD       | OM885391 | This study |
| 107 | China/SD/2019/074              | 2019 | SD/China  | Stool   | HFMD       | OM885393 | This study |
| 108 | China/SD/2019/114              | 2019 | SD/China  | Stool   | HFMD       | OM885394 | This study |
| 109 | China/SD/2019/130              | 2019 | SD/China  | Stool   | HFMD       | OM885395 | This study |
| 110 | China/SD/2019/323              | 2019 | SD/China  | Stool   | HFMD       | OM885396 | This study |
| 111 | China/SD/2019/403              | 2019 | SD/China  | Stool   | HFMD       | OM885397 | This study |
| 112 | China/SD/2019/437              | 2019 | SD/China  | Stool   | HFMD       | OM885398 | This study |
| 113 | China/XJ/2015/83               | 2015 | XJ/China  | Stool   | HFMD       | OM885399 | This study |
| 114 | China/XJ/2017/117              | 2015 | XJ/China  | Stool   | HFMD       | OM885400 | This study |
| 115 | China/XJ/2018/101              | 2015 | XJ/China  | Stool   | HFMD       | OM885402 | This study |
| 116 | China/YN/2014/131              | 2014 | YN/China  | Stool   | HFMD       | OM885403 | This study |
| 117 | 99.358.0740                    | 1999 | Australia | Unknown | N/A        | GU142874 | GenBank    |
| 118 | CF315290013_FRA15-10-16_CV-A9  | 2015 | France    | CSF     | Meningitis | MK086198 | GenBank    |
| 119 | 408/CSF/CVA9/RUS/Omsk/2013     | 2013 | Russia    | CSF     | AM         | KU133635 | GenBank    |
| 120 | SPb_5005/13EVI/RKa-32/14/RU    | 2013 | Russia    | CSF     | AM         | KU841453 | GenBank    |
| 121 | 297/CSF/CVA9/RUS/Omsk/2012     | 2012 | Russia    | CSF     | AM         | KU133591 | GenBank    |
| 122 | 302/CSF/CVA9/RUS/Omsk/2012     | 2012 | Russia    | CSF     | AM         | KU133594 | GenBank    |
| 123 | 299/CSF/CVA9/RUS/Omsk/2012     | 2012 | Russia    | CSF     | AM         | KU133593 | GenBank    |
| 124 | 309/CSF/CVA9/RUS/Omsk/2012     | 2012 | Russia    | CSF     | AM         | KU133597 | GenBank    |
| 125 | 270/CSF/CVA9/RUS/Omsk/2012     | 2012 | Russia    | CSF     | AM         | KU133580 | GenBank    |
| 126 | 325/CSF/CVA9/RUS/Omsk/2012     | 2012 | Russia    | CSF     | AM         | KU133606 | GenBank    |
| 127 | China/XJ/2018/99               | 2018 | XJ/China  | Stool   | HFMD       | OM885401 | This study |
| 128 | USA/2015/CA-RGDS-1050          | 2015 | USA       | Stool   | Unknown    | MN166093 | GenBank    |
| 129 | Monastir/F26/CSF_5.05_TUN_2011 | 2011 | Tunisia   | CSF     | AM         | LN713452 | GenBank    |
| 130 | Monastir/F26/CSF_4.13_TUN_2011 | 2011 | Tunisia   | CSF     | AM         | LN713453 | GenBank    |
| 131 | CF152050_TH_FRA10              | 2010 | France    | Throat  | AM         | LN876173 | GenBank    |
| 132 | CF035013_F_FRA11               | 2011 | France    | Stool   | AM         | LN876174 | GenBank    |
| 133 | CF193068_PL_FRA11              | 2011 | France    | Serum   | AM         | LN876175 | GenBank    |
| 134 | CF215004_CSF_FRA11             | 2011 | France    | CSF     | AM         | LN876176 | GenBank    |
| 135 | CF185079_TH_FRA07              | 2007 | France    | Throat  | AM         | LN876177 | GenBank    |
| 136 | 409-CSF/CVA9/RUS/Omsk/2013     | 2013 | Russia    | CSF     | AM         | KU133636 | GenBank    |
| 137 | 393/CSF/CVA9/RUS/Omsk/2013     | 2013 | Russia    | CSF     | AM         | KU133625 | GenBank    |
| 138 | 313/CSF/CVA9/RUS/Omsk/2012     | 2012 | Russia    | CSF     | AM         | KU133600 | GenBank    |
| 139 | 312/CSF/CVA9/RUS/Omsk/2012     | 2012 | Russia    | CSF     | AM         | KU133599 | GenBank    |
| 140 | 296/CSF/CVA9/RUS/Omsk/2012     | 2012 | Russia    | CSF     | AM         | KU133590 | GenBank    |
| 141 | 261/CSF/CVA9/RUS/Omsk/2012     | 2012 | Russia    | CSF     | AM         | KU133574 | GenBank    |
| 142 | 03-132NPR2                     | 2003 | Japan     | Unknown | Unknown    | AB167978 | GenBank    |
| 143 | 03-144NPC3                     | 2003 | Japan     | Unknown | Unknown    | AB167979 | GenBank    |
| 144 | 03-171FCR2                     | 2003 | Japan     | Unknown | Unknown    | AB167980 | GenBank    |
| 145 | 148-00                         | 2000 | China/YN  | Stool   | AFP        | AB268121 | GenBank    |
| 146 | 49-98                          | 1998 | China/YN  | Stool   | AFP        | AB268123 | GenBank    |
| 147 | 78-97                          | 1997 | China/YN  | Stool   | AFP        | AB268124 | GenBank    |
| 148 | CA9/25-0066/Osaka/2013         | 2013 | Japan     | Throat  | Unknown    | AB908274 | GenBank    |
| 149 | TR081056-05                    | 2005 | France    | Unknown | Unknown    | AM236967 | GenBank    |
| 150 | CF186011/CSF_4.96_FRA08        | 2008 | France    | CSF     | AM         | HG793656 | GenBank    |
| 151 | CF239034/CSF_4.96_FRA08        | 2008 | France    | CSF     | AM         | HG793657 | GenBank    |
| 152 | CF179026/CSF_6.13_FRA10        | 2010 | France    | CSF     | AM         | HG793658 | GenBank    |
| 153 | CF183009/CSF_5.54_FRA10        | 2010 | France    | CSF     | AM         | HG793659 | GenBank    |
| 154 | CF242122/CSF_4.10_FRA10        | 2010 | France    | CSF     | AM         | HG793660 | GenBank    |
| 155 | CF192070/CSF_6.21_FRA11        | 2011 | France    | CSF     | AM         | HG793661 | GenBank    |
| 156 | CF193055/CSF_5.29_FRA11        | 2011 | France    | CSF     | AM         | HG793662 | GenBank    |

|     |                         |         |        |         |          |          |         |
|-----|-------------------------|---------|--------|---------|----------|----------|---------|
| 157 | CF197008/CSF_5.28_FRA11 | 2011    | France | CSF     | AM       | HG793663 | GenBank |
| 158 | CF207004/CSF_5.64_FRA11 | 2011    | France | CSF     | AM       | HG793664 | GenBank |
| 159 | N-451A                  | 2007-09 | India  | Unknown | Unknown  | JN203525 | GenBank |
| 160 | N-452                   | 2007-09 | India  | Unknown | Unknown  | JN203526 | GenBank |
| 161 | N-656                   | 2007-09 | India  | Unknown | Unknown  | JN203527 | GenBank |
| 162 | N-683                   | 2007-09 | India  | Unknown | Unknown  | JN203528 | GenBank |
| 163 | N-828                   | 2007-09 | India  | Unknown | Unknown  | JN203529 | GenBank |
| 164 | N-924                   | 2007-09 | India  | Unknown | Unknown  | JN203530 | GenBank |
| 165 | A16-53PD                | 2010    | India  | Stool   | Diarrhea | KF177115 | GenBank |

---
